# Supplementary material for: Chronic sequelae complicate convalescence from both dengue and acute viral respiratory illness
Source: PubMed Central journal article supplement (PMC9426910; doi:10.1371/journal.pntd.0010724), 2022-08-18

# PLOS Neglected Tropical Diseases

## Chronic sequelae complicate convalescence from both dengue and acute viral respiratory illness --Manuscript Draft--

|                                                                                                                                                                                                                                                                                                                                                                                                                                                                                               |                                                                                                                                                                                                                                                                                                                                                                                                                                                                                                                                                                                                                                                                                                                                                                                                                                                                                                                                                                                                                                                                                                                                                                                                                                                                                                                                                                                                                                                                                                                                                                                                                                                                                                                                                                                                                                                                                                                                                                                                                                                                                                          |
|-----------------------------------------------------------------------------------------------------------------------------------------------------------------------------------------------------------------------------------------------------------------------------------------------------------------------------------------------------------------------------------------------------------------------------------------------------------------------------------------------|----------------------------------------------------------------------------------------------------------------------------------------------------------------------------------------------------------------------------------------------------------------------------------------------------------------------------------------------------------------------------------------------------------------------------------------------------------------------------------------------------------------------------------------------------------------------------------------------------------------------------------------------------------------------------------------------------------------------------------------------------------------------------------------------------------------------------------------------------------------------------------------------------------------------------------------------------------------------------------------------------------------------------------------------------------------------------------------------------------------------------------------------------------------------------------------------------------------------------------------------------------------------------------------------------------------------------------------------------------------------------------------------------------------------------------------------------------------------------------------------------------------------------------------------------------------------------------------------------------------------------------------------------------------------------------------------------------------------------------------------------------------------------------------------------------------------------------------------------------------------------------------------------------------------------------------------------------------------------------------------------------------------------------------------------------------------------------------------------------|
| <b>Manuscript Number:</b>                                                                                                                                                                                                                                                                                                                                                                                                                                                                     | PNTD-D-22-00645                                                                                                                                                                                                                                                                                                                                                                                                                                                                                                                                                                                                                                                                                                                                                                                                                                                                                                                                                                                                                                                                                                                                                                                                                                                                                                                                                                                                                                                                                                                                                                                                                                                                                                                                                                                                                                                                                                                                                                                                                                                                                          |
| <b>Full Title:</b>                                                                                                                                                                                                                                                                                                                                                                                                                                                                            | Chronic sequelae complicate convalescence from both dengue and acute viral respiratory illness                                                                                                                                                                                                                                                                                                                                                                                                                                                                                                                                                                                                                                                                                                                                                                                                                                                                                                                                                                                                                                                                                                                                                                                                                                                                                                                                                                                                                                                                                                                                                                                                                                                                                                                                                                                                                                                                                                                                                                                                           |
| <b>Short Title:</b>                                                                                                                                                                                                                                                                                                                                                                                                                                                                           | Chronic sequelae after dengue and acute viral respiratory illness                                                                                                                                                                                                                                                                                                                                                                                                                                                                                                                                                                                                                                                                                                                                                                                                                                                                                                                                                                                                                                                                                                                                                                                                                                                                                                                                                                                                                                                                                                                                                                                                                                                                                                                                                                                                                                                                                                                                                                                                                                        |
| <b>Article Type:</b>                                                                                                                                                                                                                                                                                                                                                                                                                                                                          | Research Article                                                                                                                                                                                                                                                                                                                                                                                                                                                                                                                                                                                                                                                                                                                                                                                                                                                                                                                                                                                                                                                                                                                                                                                                                                                                                                                                                                                                                                                                                                                                                                                                                                                                                                                                                                                                                                                                                                                                                                                                                                                                                         |
| <b>Keywords:</b>                                                                                                                                                                                                                                                                                                                                                                                                                                                                              | Dengue; Viral respiratory infection; chronic sequelae                                                                                                                                                                                                                                                                                                                                                                                                                                                                                                                                                                                                                                                                                                                                                                                                                                                                                                                                                                                                                                                                                                                                                                                                                                                                                                                                                                                                                                                                                                                                                                                                                                                                                                                                                                                                                                                                                                                                                                                                                                                    |
| <b>Abstract:</b>                                                                                                                                                                                                                                                                                                                                                                                                                                                                              | <p>Long Covid has raised awareness of the potentially disabling chronic sequelae that afflicts patients after acute viral infection. Similar syndromes of post-infectious sequelae have also been observed after other viral infections such as dengue, but their true prevalence and functional impact remain poorly defined. We prospectively enrolled 209 patients with acute dengue (n=48; one with severe dengue) and other acute viral respiratory infections (ARI) (n=161), and followed them up for chronic sequelae up to one year post-enrolment, prior to the onset of the Covid-19 pandemic. Baseline demographics and co-morbidities were balanced between both groups except for gender, with more males in the dengue cohort (63% vs 29%, p&lt;0.001). Except for the first visit, data on symptoms were collected remotely using a purpose-built mobile phone application. Mental health outcomes were evaluated using the validated SF-12v2 Health Survey. Almost all patients (95.8% of dengue and 94.4% of ARI patients) experienced at least one symptom of fatigue, somnolence, headache, concentration impairment or memory impairment within the first week of enrolment. Amongst patients with at least 3-months of follow-up, 18.0% in the dengue cohort and 14.6% in the ARI cohort experienced persistent symptoms. The median month-3 SF-12v2 Mental Component Score was lower in patients who remained symptomatic at 3 months and beyond, compared to those whose symptoms fully resolved, indicating that patients who self-reported persistence of symptoms also experienced functionally worse mental health. No statistically significant difference in age, gender distribution or hospitalisation status was observed between those with and without chronic sequelae. Our findings reveal an under-appreciated burden of post-infection chronic sequelae in dengue and ARI patients. They call for studies to define the pathophysiology of this condition, and determine the efficacy of both vaccines as well as antiviral drugs in preventing such sequelae.</p> |
| <b>Additional Information:</b>                                                                                                                                                                                                                                                                                                                                                                                                                                                                |                                                                                                                                                                                                                                                                                                                                                                                                                                                                                                                                                                                                                                                                                                                                                                                                                                                                                                                                                                                                                                                                                                                                                                                                                                                                                                                                                                                                                                                                                                                                                                                                                                                                                                                                                                                                                                                                                                                                                                                                                                                                                                          |
| <b>Question</b>                                                                                                                                                                                                                                                                                                                                                                                                                                                                               | <b>Response</b>                                                                                                                                                                                                                                                                                                                                                                                                                                                                                                                                                                                                                                                                                                                                                                                                                                                                                                                                                                                                                                                                                                                                                                                                                                                                                                                                                                                                                                                                                                                                                                                                                                                                                                                                                                                                                                                                                                                                                                                                                                                                                          |
| <b>Financial Disclosure</b><br><br>Enter a financial disclosure statement that describes the sources of funding for the work included in this submission. Review the <a href="#">submission guidelines</a> for detailed requirements. View published research articles from <a href="#">PLOS NTDs</a> for specific examples.<br><br>This statement is required for submission and <b>will appear in the published article</b> if the submission is accepted. Please make sure it is accurate. | This work was funded by a SingHealth Foundation Research Grant (SHF/FG622P/2016) and the National Research Foundation through the Singapore MIT Alliance for Research and Technology Antimicrobial Resistance Integrative Research Group.                                                                                                                                                                                                                                                                                                                                                                                                                                                                                                                                                                                                                                                                                                                                                                                                                                                                                                                                                                                                                                                                                                                                                                                                                                                                                                                                                                                                                                                                                                                                                                                                                                                                                                                                                                                                                                                                |

### Unfunded studies

Enter: *The author(s) received no specific funding for this work.*

### Funded studies

Enter a statement with the following details:

- Initials of the authors who received each award
- Grant numbers awarded to each author
- The full name of each funder
- URL of each funder website
- Did the sponsors or funders play any role in the study design, data collection and analysis, decision to publish, or preparation of the manuscript?
- **NO** - Include this sentence at the end of your statement: *The funders had no role in study design, data collection and analysis, decision to publish, or preparation of the manuscript.*
- **YES** - Specify the role(s) played.

\* typeset

### Competing Interests

Use the instructions below to enter a competing interest statement for this submission. On behalf of all authors, disclose any [competing interests](#) that could be perceived to bias this work—acknowledging all financial support and any other relevant financial or non-financial competing interests.

This statement **will appear in the published article** if the submission is accepted. Please make sure it is accurate. View published research articles from [PLOS NTDs](#) for specific examples.

The authors have declared that no competing interests exist.

**NO authors have competing interests**

Enter: *The authors have declared that no competing interests exist.*

**Authors with competing interests**

Enter competing interest details beginning with this statement:

*I have read the journal's policy and the authors of this manuscript have the following competing interests: [insert competing interests here]*

\* typeset

This statement is **required** for submission and **will appear in the published article** if the submission is accepted. Please make sure it is accurate and that any funding sources listed in your Funding Information later in the submission form are also declared in your Financial Disclosure statement.

**Data Availability**

Authors are required to make all data underlying the findings described fully available, without restriction, and from the time of publication. PLOS allows rare exceptions to address legal and ethical concerns. See the [PLOS Data Policy](#) and [FAQ](#) for detailed information.

No - some restrictions will apply

A Data Availability Statement describing where the data can be found is required at submission. Your answers to this question constitute the Data Availability Statement and **will be published in the article**, if accepted.

**Important:** Stating 'data available on request from the author' is not sufficient. If your data are only available upon request, select 'No' for the first question and explain your exceptional situation in the text box.

Do the authors confirm that all data underlying the findings described in their manuscript are fully available without restriction?

**Describe where the data may be found in full sentences. If you are copying our sample text, replace any instances of XXX with the appropriate details.**

- If the data are **held or will be held in a public repository**, include URLs, accession numbers or DOIs. If this information will only be available after acceptance, indicate this by ticking the box below. For example: *All XXX files are available from the XXX database (accession number(s) XXX, XXX).*
- If the data are all contained **within the manuscript and/or Supporting Information files**, enter the following: *All relevant data are within the manuscript and its Supporting Information files.*
- If neither of these applies but you are able to provide **details of access elsewhere**, with or without limitations, please do so. For example:

Data cannot be shared publicly because of institutional data regulations on confidential data sharing. Please contact the corresponding author if access to data is required.

*Data cannot be shared publicly because of [XXX]. Data are available from the XXX Institutional Data Access / Ethics Committee (contact via XXX) for researchers who meet the criteria for access to confidential data.*

*The data underlying the results presented in the study are available from (include the name of the third party and contact information or URL).*

- This text is appropriate if the data are owned by a third party and authors do not have permission to share the data.

\* typeset

Additional data availability information:

1 **Chronic sequelae complicate convalescence from both dengue and acute viral respiratory**  
2 **illness**

3 Shirin Kalimuddin<sup>1,2\*</sup>, Yii Ean Teh<sup>1</sup>, Liang En Wee<sup>1</sup>, Shay Paintal<sup>3</sup>, Ram Sasisekharan<sup>4,5</sup>,  
4 Jenny G Low<sup>1,2,6</sup>, Sujata K Sheth<sup>7</sup>, Eng Eong Ooi<sup>2,6,8\*</sup>

5 1. Department of Infectious Diseases, Singapore General Hospital, Singapore

6 2. Program in Emerging Infectious Diseases, Duke-NUS Medical School, Singapore

7 3. Accio Systems Pte Ltd, Singapore

8 4. Antimicrobial Resistance Interdisciplinary Research Group, Singapore-MIT Alliance  
9 for Research and Technology, Singapore

10 5. Department of Biological Engineering, Massachusetts Institute of Technology, USA

11 6. Viral Research and Experimental Medicine Centre, SingHealth Duke-NUS Academic  
12 Medical Centre, Singapore

13 7. Department of Emergency Medicine, Changi General Hospital, Singapore

14 8. Saw Swee Hock School of Public Health, National University of Singapore, Singapore

15

16 \*Correspondence to:

17 Shirin Kalimuddin, email: shirin.kalimuddin@singhealth.com.sg

18 Eng Eong Ooi, email: engeong.ooi@duke-nus.edu.sg

## 19 **Abstract**

20 Long Covid has raised awareness of the potentially disabling chronic sequelae that afflicts  
21 patients after acute viral infection. Similar syndromes of post-infectious sequelae have also  
22 been observed after other viral infections such as dengue, but their true prevalence and  
23 functional impact remain poorly defined. We prospectively enrolled 209 patients with acute  
24 dengue (n=48; one with severe dengue) and other acute viral respiratory infections (ARI)  
25 (n=161), and followed them up for chronic sequelae up to one year post-enrolment, prior to the  
26 onset of the Covid-19 pandemic. Baseline demographics and co-morbidities were balanced  
27 between both groups except for gender, with more males in the dengue cohort (63% vs 29%,  
28  $p<0.001$ ). Except for the first visit, data on symptoms were collected remotely using a purpose-  
29 built mobile phone application. Mental health outcomes were evaluated using the validated SF-  
30 12v2 Health Survey. Almost all patients (95.8% of dengue and 94.4% of ARI patients)  
31 experienced at least one symptom of fatigue, somnolence, headache, concentration impairment  
32 or memory impairment within the first week of enrolment. Amongst patients with at least 3-  
33 months of follow-up, 18.0% in the dengue cohort and 14.6% in the ARI cohort experienced  
34 persistent symptoms. The median month-3 SF-12v2 Mental Component Score was lower in  
35 patients who remained symptomatic at 3 months and beyond, compared to those whose  
36 symptoms fully resolved, indicating that patients who self-reported persistence of symptoms  
37 also experienced functionally worse mental health. No statistically significant difference in age,  
38 gender distribution or hospitalisation status was observed between those with and without  
39 chronic sequelae. Our findings reveal an under-appreciated burden of post-infection chronic  
40 sequelae in dengue and ARI patients. They call for studies to define the pathophysiology of  
41 this condition, and determine the efficacy of both vaccines as well as antiviral drugs in  
42 preventing such sequelae.

43 Word count: 291

## 44 **Introduction**

45 As the Coronavirus Disease 2019 (Covid-19) pandemic continues to affect millions around  
46 the world, there has been increasing awareness on the potentially disabling syndrome of long  
47 Covid. Long Covid afflicts a significant proportion of patients after convalescence from Severe  
48 Acute Respiratory Syndrome Coronavirus 2 (SARS-CoV-2) infection, and includes symptoms  
49 such as fatigue, “brain fog” and even depression, which persist for 3 months or more acute  
50 infection (1-3). Yet, this syndrome of post-infectious chronic sequelae is not confined  
51 exclusively to SARS-CoV-2, but has also been observed after convalescence from other acute  
52 viral infections, one of which is dengue (4).

53 Dengue is an acute mosquito-borne viral illness that afflicts an estimated one hundred  
54 million people annually (5, 6). There is no licensed anti-dengue therapeutic, and the only  
55 currently licensed dengue vaccine has safety and efficacy concerns (7). The acute symptoms  
56 of infection usually last 7-10 days, and range from self-limiting undifferentiated fever, to more  
57 severe and potentially fatal dengue haemorrhagic fever and shock (5). Much less however, is  
58 understood about post-dengue chronic sequelae. Although symptoms such as fatigue and  
59 cognitive impairment have been described post-infection, many of these observations were  
60 made retrospectively and thus subject to recall bias, or were derived after a relatively short  
61 period of study follow-up (8-12). As such, the true prevalence and duration of post-dengue  
62 chronic sequelae remain poorly defined. Such sequelae would not only have a direct impact on  
63 patient convalescence, they would also detrimentally affect the economic productivity of many  
64 individuals living in dengue endemic areas. Consequently, the true societal and economic  
65 impact of dengue is likely underestimated (13).

66 To understand the true prevalence of post-dengue chronic sequelae, we designed a Mobile-  
67 phone Application for Information extraction in Dengue (MAIDEN). The use of MAIDEN  
68 enabled data collection to be conducted remotely, removing the need for frequent in-person



69 study visits, thus minimising study costs and avoiding high participant drop-out rates often  
70 associated with large prospective studies. In addition, we also took advantage of MAIDEN to  
71 explore the impact of chronic sequelae in patients with acute viral respiratory infections (ARI),  
72 another highly prevalent group of acute viral infections prior to the emergence of SARS-CoV-  
73 2, but in which the occurrence of long-term sequelae is even more poorly defined. We  
74 prospectively enrolled two separate cohorts of patients with confirmed dengue and ARI and  
75 followed them for up to one-year post-illness onset. Our findings suggest that chronic sequelae  
76 such as fatigue and central nervous system (CNS)-related symptoms are prevalent in adults  
77 after acute dengue, and also affect a sizeable proportion of patients post-ARI.

## 78 **Methods**

### 79 **Study Participants**

80 Patients were recruited from the inpatient wards, emergency department and staff  
81 healthcare clinic of two hospitals in Singapore, between 20 September 2017 and 29 March  
82 2019.

83 Patients were divided into two cohorts: acute dengue and those with ARI. Patients were  
84 included in the dengue cohort if they had a confirmed diagnosis of acute dengue based on  
85 compatible clinical features, positive serum dengue NS1 antigen and/or dengue virus (DENV)  
86 polymerase chain reaction (PCR). Patients were included in the ARI cohort if they presented  
87 with symptoms compatible with a viral upper respiratory tract infection (fever with rhinorrhea,  
88 sore throat or cough) or had a viral respiratory tract infection confirmed by respiratory virus  
89 multiplex PCR from a respiratory sample within 48 hours prior to enrolment. All patients  
90 enrolled had to have access to a mobile phone with internet capability. In both the dengue and  
91 ARI cohorts, patients were excluded if they had active malignancy, neurological,  
92 rheumatological or psychiatric conditions, dementia or cognitive impairment, concomitant  
93 bacterial infection, pneumonia, surgery within the preceding 3 months, previous hospitalization

94 in the past 6 months, were receiving immunosuppressive therapy, or had chronic viral infection  
95 such as human immunodeficiency virus or hepatitis B or C. Written informed consent was  
96 obtained from all patients and the study was approved by the local institutional ethics  
97 committee (Ref: CIRB 2017/2308).

## 98 **Laboratory methods**

99 Serum dengue NS1 was measured using a commercially available single step EIA  
100 (Platelia™ Dengue NS1 Antigen, BioRad). DENV genome was detected using a multiplex  
101 real-time polymerase chain reaction (PCR) (FTD Zika/Dengue/Chik, Fast Track Diagnostics,  
102 Luxembourg) on RNA. Respiratory virus multiplex PCR was performed using an in-house  
103 protocol based on the Anyplex™ II RV16 respiratory virus panel (Seegne Inc.), and included  
104 the following viruses: respiratory syncytial viruses A and B, influenza A and B, parainfluenza  
105 viruses 1-4, metapneumovirus, rhinovirus, human coronavirus OC43, 229E and NL63,  
106 adenovirus, human enterovirus and human bocavirus 1-4.

## 107 **Clinical data collection**

108 At enrolment after informed consent, relevant demographic and clinical data were  
109 collected from patients' medical records. Patients were sent a web link via e-mail to download  
110 the MAIDEN application onto their mobile phone, as well as a unique user-ID and password  
111 to enable them to access the application. A member of the study team then provided a short  
112 tutorial on how to use MAIDEN (Fig 1A). At each visit, patients would enter information  
113 regarding symptoms experienced (including the absence or presence of fatigue, somnolence,  
114 headache, concentration impairment and/or memory impairment) and self-reported overall  
115 health into MAIDEN (see Supporting Information S1 for the full list of questions). The overall  
116 health assessments were adapted from the SF-12v2® health survey, which is a validated tool

117 for self-reported physical and mental wellbeing measurement (14-17). Briefly, the SF-12v2®  
118 consists of 12 questions that measure eight health domains to assess physical and mental health.  
119 Specifically, mental health-related scales include Vitality (VT), Social Functioning (SF), Role  
120 Emotional (RE), and Mental Health (MH). Mental Composite Scores (MCS) were calculated  
121 using the weighted means of each mental health domain, with a score of 50 considered the  
122 population average. Thus, a score below 50 would indicate worse mental health than the  
123 expected average, and a score above 50 would indicate better mental health.

124 Patients were followed-up daily for the first 7 days, weekly from weeks 2 - 8, and then  
125 monthly from month-3 onwards, up to one-year following acute illness. Except for the first  
126 visit at study enrolment, patients were not required to attend the study site in-person, and would  
127 be sent reminders by either short messaging system (SMS) or push notification to enter data  
128 remotely into MAIDEN when each study “visit” was due. If patients encountered any technical  
129 difficulties or had questions about the study, they could contact the study team directly either  
130 via phone call or email, or through a direct messaging system within MAIDEN. All data entered  
131 into MAIDEN was stored on a secure cloud server and downloaded onto a data management  
132 platform for analysis.

### 133 **Definitions**

134 We defined “chronic sequelae” as symptoms (fatigue, somnolence, headache,  
135 concentration impairment or memory impairment) lasting for at least 3-months post-infection.  
136 A patient’s symptoms were considered resolved if they did not report any symptoms for at least  
137 2-months after the last date of symptoms reported, and were considered lost to follow-up if  
138 they did not enter any data into MAIDEN for more than a 2-month period.

## 139 **Statistical Analysis**

140 Differences in demographic features, co-morbidities, prevalence of symptoms at  
141 enrolment and MCS between the dengue and ARI cohorts, and those with and without chronic  
142 sequelae were analysed using the Fisher's exact test for categorical variables or Mann-Whitney  
143 test for continuous variables. Time to resolution of symptoms in both the dengue and ARI  
144 cohorts were analysed using Kaplan-Meier analyses. The SF12v2 MCS was calculated using  
145 the Optum® PRO CoRE software. P-values <0.05 were considered statistically significant. All  
146 statistical analyses were performed using GraphPad Prism version 9.2.0.

## 147 **Results**

148 A total of 209 patients were enrolled during the study period, with 48 patients in the  
149 dengue cohort, and 161 patients in the ARI cohort. 81.3% (39/48) of dengue patients and 98.1%  
150 (158/161) of ARI patients completed at least 3 months of study follow-up (Fig 1B). Table 1  
151 shows the demographic and clinical profile of both patient cohorts. Baseline demographics  
152 such as age, ethnicity and co-morbidities were balanced between both groups, except for  
153 gender, with more males in the dengue cohort (63% vs. 29%,  $p < 0.001$ ). More patients in the  
154 dengue cohort were hospitalized compared to those in the ARI cohort (77.1 % vs 18.1%,  
155  $p < 0.001$ ), reflecting differences in clinical management between these two disease types. Only  
156 one patient had severe dengue, as defined by the World Health Organization (WHO) 2009  
157 dengue classification scheme (18). Within the ARI cohort, the specific viral etiology was tested  
158 for in 29 patients. Among these patients, influenza virus and rhinovirus were the most common  
159 etiologies identified (Table 1).

|                                                           | Dengue Cohort<br>(n=48) | ARI Cohort<br>(n=161) | p-value          |
|-----------------------------------------------------------|-------------------------|-----------------------|------------------|
| <b>Demographics</b>                                       |                         |                       |                  |
| Age                                                       |                         |                       |                  |
| Median (range),<br>years                                  | 37.0 (21 - 68)          | 34.0 (22 - 79)        | 0.39             |
| Male sex, no. (%)                                         | 30 (62.5)               | 46 (28.6)             | <b>&lt;0.001</b> |
| Ethnicity, no. (%)                                        |                         |                       |                  |
| Chinese                                                   | 29 (60.4)               | 77 (47.8)             |                  |
| Malay                                                     | 12 (25.0)               | 36 (22.4)             |                  |
| Indian                                                    | 3 (6.3)                 | 21 (13.0)             |                  |
| Others                                                    | 4 (33.3)                | 27 (16.8)             |                  |
| Co-morbidities, no. (%)                                   |                         |                       |                  |
| Diabetes mellitus                                         | 2 (4.2)                 | 5 (3.1)               | 0.72             |
| Hypertension                                              | 4 (8.3)                 | 16 (9.9)              | 0.74             |
| Ischemic heart<br>disease                                 | 2 (4.2)                 | 2 (1.2)               | 0.19             |
| <b>Disposition</b>                                        |                         |                       |                  |
| Hospitalised, no (%)                                      | 37 (77.1)               | 29 (18.0)             | <b>&lt;0.001</b> |
| <b>Study Compliance</b>                                   |                         |                       |                  |
| Completed at least 3 months<br>of study follow-up, no (%) | 39 (81.3)               | 158 (98.1)            | <b>&lt;0.001</b> |
| <b>Viral Etiology</b>                                     |                         |                       |                  |
| Severe dengue, no. (%)                                    | 1 (2.0)                 | -                     | NA               |
| Respiratory virus type,<br>no. (%)*                       |                         |                       |                  |
| Influenza A & B                                           | -                       | 14 (48.3)             |                  |
| Rhinovirus                                                | -                       | 6 (20.7)              |                  |
| Adenovirus                                                | -                       | 4 (13.8)              |                  |
| Human coronavirus (OC43)                                  | -                       | 4 (13.8)              |                  |
| Parainfluenza                                             | -                       | 3 (10.3)              |                  |
| Human coronavirus (NL63)                                  | -                       | 1 (3.4)               |                  |
| Enterovirus                                               | -                       | 1 (3.4)               |                  |
| <b>Clinical Features</b>                                  |                         |                       |                  |
| Symptom type at<br>presentation, no (%)                   |                         |                       |                  |
| Any symptom**                                             | 46 (95.8)               | 152 (94.4)            | 1.00             |
| Fatigue                                                   | 38 (79.2)               | 136 (84.5)            | 0.51             |
| Somnolence                                                | 32 (66.7)               | 93 (57.8)             | 0.32             |
| Headache                                                  | 29 (60.4)               | 119 (74.0)            | 0.07             |
| Concentration impairment                                  | 29 (60.4)               | 95 (59.0)             | 0.86             |
| Memory impairment                                         | 13 (27.1)               | 28 (17.4)             | 0.15             |

160 **Table 1. Demographics and clinical features of the study cohort.** \*Within the ARI cohort,  
161 the specific viral etiology was known in 29 patients. The percentage reported is out of a total  
162 of 29 patients. Of these 29 patients, 4 patients tested positive for two different viruses  
163 concurrently on multiplex PCR – influenza and adenovirus (n=1), influenza and human  
164 coronavirus OC43 (n=1), parainfluenza and respiratory syncytial virus (n=1), and  
165 parainfluenza and enterovirus virus (n=1). \*\*Any one of fatigue, somnolence, headache,  
166 concentration impairment or memory impairment.

167 Almost all patients (95.8% of dengue and 94.4% of ARI patients) experienced fatigue  
168 or at least one other CNS-related symptom (somnolence, headache, concentration impairment

169 and/or memory impairment) within the first week after enrolment. Fatigue and somnolence  
170 were the most commonly reported symptoms in the dengue cohort, while lethargy and  
171 headache were most common in the ARI cohort (Table 1). Amongst patients with at least 3-  
172 months of follow-up, 18.0% in the dengue cohort and 14.6% in the ARI cohort experienced  
173 chronic sequelae (Table 2). In the dengue cohort, fatigue, concentration impairment and  
174 memory impairment were the most commonly reported chronic symptoms, while fatigue and  
175 headache were most prevalent in the ARI cohort. Kaplan-Meier analysis indicated that fatigue  
176 and CNS-related symptoms resolved within weeks of convalescence in the majority of dengue  
177 patients. However, the rate of full recovery then plateaued and even persisted in some patients  
178 until the end of our observation period (Fig 2A). Similar trends were observed in patients with  
179 ARI (Fig 2B). No statistically significant difference in age, gender distribution or  
180 hospitalisation status was observed between those with and without chronic sequelae (Table 3).

|                                                  | Dengue Group<br>(n =39) | ARI Cohort<br>(n=158) | p-value |
|--------------------------------------------------|-------------------------|-----------------------|---------|
| <b>Chronic Sequelae</b>                          |                         |                       |         |
| Any symptom persisting $\geq$ 3 months*, no. (%) | 7 (18.0)                | 23 (14.5)             | 0.62    |
| Symptom type at month 3, no (%)                  |                         |                       |         |
| Fatigue                                          | 4 (10.3)                | 15 (9.5)              | 1.00    |
| Somnolence                                       | 1 (2.6)                 | 10 (6.3)              | 0.47    |
| Headache                                         | 2 (5.1)                 | 13 (8.2)              | 0.74    |
| Concentration impairment                         | 4 (10.3)                | 10 (6.3)              | 0.48    |
| Memory impairment                                | 4 (10.3)                | 8 (5.1)               | 0.25    |

181 **Table 2. Symptoms in patients with chronic sequelae.** Analysis performed on patients with  
182 at least 3 months of study follow-up (dengue: n=39, ARI: n=158). \*\*Any one of fatigue,  
183 somnolence, headache, concentration impairment or memory impairment.  
184

|                          | Dengue Group (n=39) |                  |         | ARI Group (n=158) |                   |         | All (n=197)       |                   |         |
|--------------------------|---------------------|------------------|---------|-------------------|-------------------|---------|-------------------|-------------------|---------|
|                          | Chronic sequelae    |                  |         | Chronic sequelae  |                   |         | Chronic sequelae  |                   |         |
|                          | Absent<br>(n=32)    | Present<br>(n=7) | p-value | Absent<br>(n=135) | Present<br>(n=23) | p-value | Absent<br>(n=167) | Present<br>(n=30) | p-value |
| <b>Age, years</b>        |                     |                  |         |                   |                   |         |                   |                   |         |
| Median<br>(range)        | 38.5<br>(21-68)     | 51<br>(24-60)    | 0.50    | 35.0<br>(23-67)   | 31.0<br>(22-64)   | 0.27    | 35.0<br>(21-68)   | 31.5<br>(22-64)   | 0.72    |
| <b>Gender</b>            |                     |                  |         |                   |                   |         |                   |                   |         |
| Male sex,<br>no. (%)     | 21<br>(65.6)        | 3<br>(42.9)      | 0.40    | 40<br>(29.6)      | 6<br>(26.1)       | 0.81    | 61<br>(36.5)      | 9<br>(30.0)       | 0.54    |
| <b>Disposition</b>       |                     |                  |         |                   |                   |         |                   |                   |         |
| Hospitalised,<br>no. (%) | 26<br>(81.3)        | 6<br>(85.7)      | 1.00    | 20<br>(14.8)      | 7<br>(30.4)       | 0.08    | 46<br>(27.5)      | 13<br>(43.3)      | 0.09    |

185 **Table 3. Demographics of patients with and without chronic sequelae.** Chronic sequelae is  
186 defined as persistence of symptoms (any one of fatigue, somnolence, headache, concentration  
187 impairment or memory impairment) for at least 3 months.  
188

189 In both cohorts, the median month-3 MCS was lower in patients who remained  
190 symptomatic at 3 months and beyond, compared to those whose symptoms fully resolved (Fig  
191 3), indicating that patients who self-reported persistence of symptoms beyond 3 months also  
192 experienced functionally worse mental health.

193 Overall, our findings indicate that a significant proportion of both dengue and ARI  
194 patients experienced chronic sequelae, and the persistence of such chronic sequelae translated  
195 to overall worse mental health outcomes.

## 196 197 Discussion

198 To date, few studies have examined the long-terms health effects of either acute dengue or  
199 non-SARS-CoV-2 ARI, making it difficult to quantify the true societal and economic impact  
200 of such acute viral infections. In this prospective study of over 200 patients, we found that a  
201 significant proportion of dengue, and even more unexpectedly ARI patients, continue to  
202 experience fatigue and CNS-related chronic sequelae for several months after resolution of the  
203 acute infection, not dissimilar to long Covid sufferers (1, 2).

204 At present, it still remains unclear what the drivers of such chronic sequelae are, and unlike  
205 Covid-19, little research has focused on the mechanistic causes of chronic sequelae post-

206 dengue. This is even less so for acute respiratory viral infections such as influenza and  
207 adenovirus. In one study of dengue patients, an association was found between the FcγRIIa  
208 (FcγRIIa-131HH) gene polymorphism, the presence of autoimmune markers and symptom  
209 persistence (9). Apart from this report, no other studies to date explored the causes of post-  
210 dengue chronic sequelae.

211       It is possible that aberrant activation of the innate immune response to the original viral  
212 stimuli may result in chronic inflammation and subsequent long term tissue damage and  
213 immune exhaustion, which may then in turn drive the development of chronic sequelae. Indeed,  
214 we have recently shown that increased baseline expression of genes associated with T-cell  
215 exhaustion was associated with the development of fatigue after SARS-CoV-2 mRNA  
216 vaccination (manuscript in press); such immune dysregulation has also been associated with  
217 the development of chronic fatigue syndrome/myalgic encephalomyelitis (19-21). In the  
218 context of long Covid, multiple mechanisms have been postulated, including chronic  
219 inflammation, antigen persistence, latent virus reactivation and development of auto-antibodies  
220 (2-4, 22). It is likely that some, if not all of these mechanisms may also apply to the  
221 development of chronic sequelae after other acute viral infections. The prevalence of such  
222 chronic sequelae and their functional impact on mental well-being underscore the need for  
223 more in-depth research to understand the specific drivers of such post-infection chronic  
224 outcomes.

225       We used MAIDEN as a study tool for remote data-collection in order to overcome the high  
226 financial costs and participant drop-out rates often associated with large prospective studies.  
227 We reasoned that remote data collection would promote better compliance from study  
228 participants in view of the convenience afforded through remote data collection. Indeed, overall  
229 study compliance was good with over 90% of patients completing at least 3 months of study  
230 follow-up. Besides improving study visit compliance, mobile data collection also allows for



231 immediate pooling of data into a centralized data warehouse, making real-time data analysis  
232 possible. Given these benefits, and the fact that over 80% of the world's population own a  
233 smartphone (23), we envisage that mobile phone applications such as MAIDEN could be a  
234 useful adjunct tool not only in the conduct of observational cohort studies, but also in the  
235 clinical trial space where such applications could be used for adverse event tracking and  
236 reporting.

237 A strength of our study is its prospective design, which avoids the problem of recall bias  
238 often associated with retrospective studies. The study follow-up period of one year also enabled  
239 the tracking of patients longitudinally over time, allowing for clearer evaluation of time to  
240 symptom resolution. Although the symptoms reported by patients were subjective in nature,  
241 the use of the validated SF12v2 health outcomes questionnaire allowed for a functional  
242 assessment of each study participant's overall mental health. Indeed, we showed that patients  
243 who reported persistence of fatigue and/or CNS-related symptoms beyond 3 months had a  
244 significantly lower MCS than their counterparts whose symptoms lasted less than 3 months,  
245 indicating that self-reported chronic sequelae translates into functionally worse mental health  
246 outcomes.

247 A limitation of our study is that patients in the ARI cohort were not tested specifically for  
248 DENV, and hence we are unable to completely exclude co-infection. We also acknowledge  
249 that the hospitalisation status was imbalanced between the two study cohorts, with a  
250 significantly higher proportion of the dengue cohort hospitalised at the time of enrolment,  
251 compared to the ARI cohort where the majority of patients were ambulatory. As such, we  
252 avoided making head-to-head comparisons between the two cohorts.

253 In conclusion, we show that persistent fatigue and CNS-related chronic sequelae, as well  
254 as poorer overall mental health, occur in a significant proportion of both dengue and ARI  
255 patients post-infection. Our findings reveal an oft under-appreciated burden of post-infection

256 chronic sequelae in both dengue and ARI patients, and highlight the need for therapeutic and  
257 preventative strategies in order to prevent both acute viral infection and its associated chronic  
258 sequelae.

## 259 **Acknowledgments**

260 We thank the clinical research coordinators from the Department of Infectious Diseases,  
261 Singapore General Hospital and the Clinical Trials & Research Unit, Changi General Hospital  
262 for assisting with this study, and the patients who volunteered for the study. This work was  
263 funded by a SingHealth Foundation Research Grant (SHF/FG622P/2016) and the National  
264 Research Foundation through the Singapore MIT Alliance for Research and Technology  
265 Antimicrobial Resistance Integrative Research Group.

266 **Figures and figure legends**

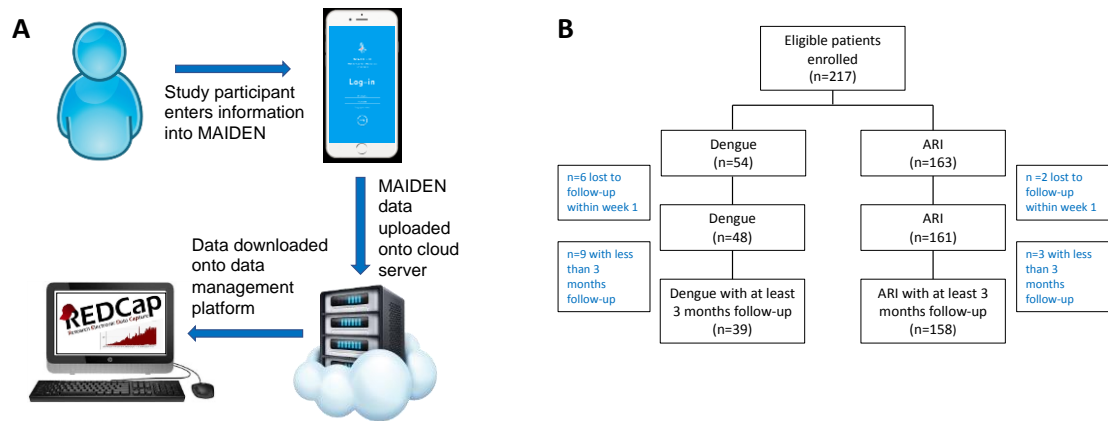

267

268 **Fig 1. Study design and enrolment** (A) Study data was collected using the Mobile Application  
269 for Information collection in Dengue (MAIDEN) application. At each study visit, patients  
270 would enter information remotely into MAIDEN which was installed on their mobile phone.  
271 The data collected would then be uploaded onto a secure cloud server and downloaded into the  
272 RedCap data management platform where it could be accessed by the study team. (B) Consort  
273 flow of patients enrolled onto the study. Patients were excluded from the overall analysis if  
274 they dropped out of the study or were lost-to-follow up within the first week after enrolment.

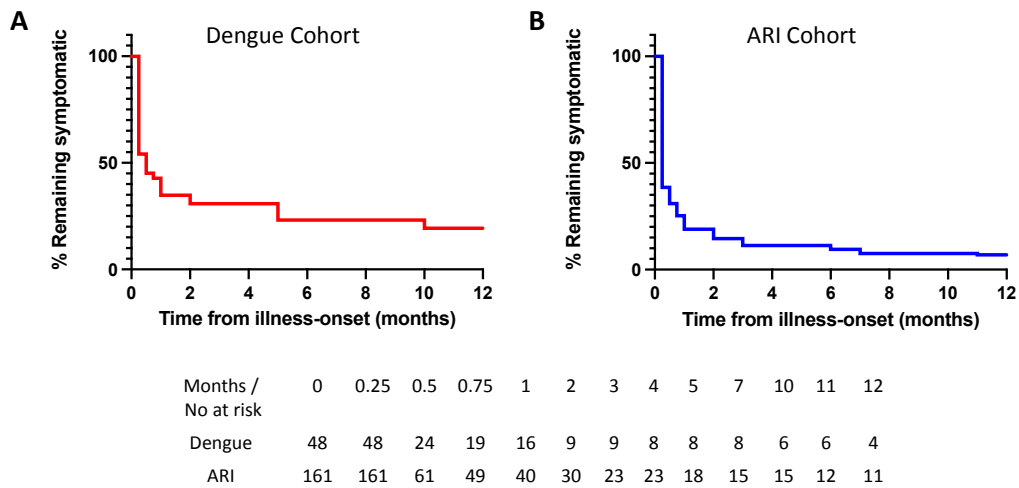

275

276 **Fig 2. Kaplan-Meier curve of time to symptom resolution.** Each curve shows the overall  
 277 time to symptom resolution (in months) after illness-onset in patients with (A) dengue and (B)  
 278 acute viral respiratory infection (ARI). The numbers of patients at risk for each of these two  
 279 groups are shown in the table immediately below the Kaplan-Meier curves.

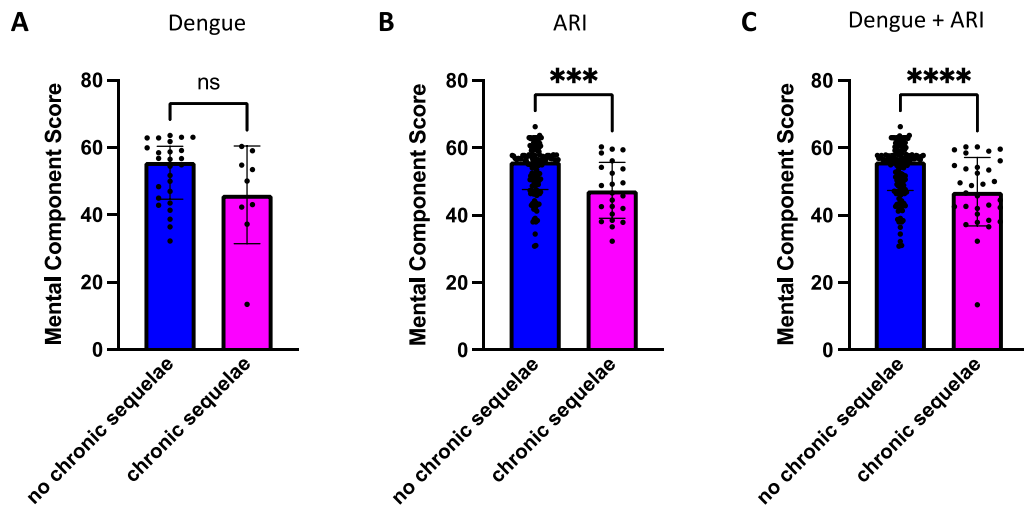

280

281 **Fig 3. SF12v2 Mental Component Score (MCS) at month 3 in patients with and without**  
 282 **chronic sequelae.** (A) Comparison of MCS within the dengue cohort. (B) Comparison of MCS

283 within the ARI cohort. (C) Comparison of MCS scores in both the dengue and ARI cohorts

284 combined. Blue bars represent the group without chronic symptoms while magenta bars

285 represent the group with chronic symptoms. Black dots indicate the individual MCS values.

286 Summary plots show the median MCS with error bars representing the interquartile range.

287 Statistics to compare the median MCS between groups was calculated using the Mann-Whitney

288 test. \*\*\* =  $p < 0.001$ , \*\*\*\* =  $p < 0.0001$ , ns = not significant.

289 **References**

- 290 1. Michelen M, Manoharan L, Elkheir N, Cheng V, Dagens A, Hastie C, et al.  
291 Characterising long COVID: a living systematic review. *BMJ Glob Health*. 2021;6(9).
- 292 2. Nalbandian A, Sehgal K, Gupta A, Madhavan MV, McGroder C, Stevens JS, et al.  
293 Post-acute COVID-19 syndrome. *Nat Med*. 2021;27(4):601-15.
- 294 3. Su Y, Yuan D, Chen DG, Ng RH, Wang K, Choi J, et al. Multiple early factors  
295 anticipate post-acute COVID-19 sequelae. *Cell*. 2022;185(5):881-95.e20.
- 296 4. Hirschenberger M, Hunszinger V, Sparrer KMJ. Implications of Innate Immunity in  
297 Post-Acute Sequelae of Non-Persistent Viral Infections. *Cells*. 2021;10(8).
- 298 5. Guzman MG, Gubler DJ, Izquierdo A, Martinez E, Halstead SB. Dengue infection.  
299 *Nature Reviews Disease Primers*. 2016;2(1):16055.
- 300 6. Guo C, Zhou Z, Wen Z, Liu Y, Zeng C, Xiao D, et al. Global Epidemiology of Dengue  
301 Outbreaks in 1990–2015: A Systematic Review and Meta-Analysis. *Frontiers in Cellular and*  
302 *Infection Microbiology*. 2017;7.
- 303 7. Thomas SJ, Yoon IK. A review of Dengvaxia®: development to deployment. *Hum*  
304 *Vaccin Immunother*. 2019;15(10):2295-314.
- 305 8. Seet RC, Quek AM, Lim EC. Post-infectious fatigue syndrome in dengue infection. *J*  
306 *Clin Virol*. 2007;38(1):1-6.
- 307 9. García G, González N, Pérez AB, Sierra B, Aguirre E, Rizo D, et al. Long-term  
308 persistence of clinical symptoms in dengue-infected persons and its association with  
309 immunological disorders. *Int J Infect Dis*. 2011;15(1):e38-43.
- 310 10. Gonzalez D, Martinez R, Castro O, Serrano T, Portela D, Vazquez S, et al. Evaluation  
311 of Some Clinical, Humoral and Imagenological Parameters in Patients of Dengue  
312 Haemorrhagic Fever Six Months after Acute Illness. 2005.

- 313 11. Halsey ES, Williams M, Laguna-Torres VA, Vilcarromero S, Ocaña V, Kochel TJ, et  
314 al. Occurrence and correlates of symptom persistence following acute dengue fever in Peru.  
315 *The American journal of tropical medicine and hygiene*. 2014;90(3):449-56.
- 316 12. Teixeira LAS, Nogueira F, Nascentes GAN. Prospective study of patients with  
317 persistent symptoms of dengue in Brazil. *Rev Inst Med Trop Sao Paulo*. 2017;59:e65.
- 318 13. Tiga DC, Undurraga EA, Ramos-Castañeda J, Martínez-Vega RA, Tschampl CA,  
319 Shepard DS. Persistent Symptoms of Dengue: Estimates of the Incremental Disease and  
320 Economic Burden in Mexico. *The American journal of tropical medicine and hygiene*.  
321 2016;94(5):1085-9.
- 322 14. Cheak-Zamora NC, Wyrwich KW, McBride TD. Reliability and validity of the SF-  
323 12v2 in the medical expenditure panel survey. *Qual Life Res*. 2009;18(6):727-35.
- 324 15. Chariyalertsak S, Wansom T, Kawichai S, Ruangyuttikarna C, Kemerer VF, Wu AW.  
325 Reliability and validity of Thai versions of the MOS-HIV and SF-12 quality of life  
326 questionnaires in people living with HIV/AIDS. *Health Qual Life Outcomes*. 2011;9:15.
- 327 16. Cernin PA, Cresci K, Jankowski TB, Lichtenberg PA. Reliability and validity testing  
328 of the short-form health survey in a sample of community-dwelling African American older  
329 adults. *J Nurs Meas*. 2010;18(1):49-59.
- 330 17. Bohannon RW, Maljanian R, Landes M. Test-retest reliability of short form (SF)-12  
331 component scores of patients with stroke. *Int J Rehabil Res*. 2004;27(2):149-50.
- 332 18. WHO Guidelines Approved by the Guidelines Review Committee. Dengue:  
333 Guidelines for Diagnosis, Treatment, Prevention and Control: New Edition. Geneva: World  
334 Health Organization
- 335 Copyright © 2009, World Health Organization.; 2009.

- 336 19. Mandarano AH, Maya J, Giloteaux L, Peterson DL, Maynard M, Gottschalk CG, et al.  
337 Myalgic encephalomyelitis/chronic fatigue syndrome patients exhibit altered T cell  
338 metabolism and cytokine associations. *J Clin Invest.* 2020;130(3):1491-505.
- 339 20. Brenu EW, Hardcastle SL, Atkinson GM, van Driel ML, Kreijkamp-Kaspers S, Ashton  
340 KJ, et al. Natural killer cells in patients with severe chronic fatigue syndrome. *Auto Immun*  
341 *Highlights.* 2013;4(3):69-80.
- 342 21. Klimas NG, Salvato FR, Morgan R, Fletcher MA. Immunologic abnormalities in  
343 chronic fatigue syndrome. *Journal of clinical microbiology.* 1990;28(6):1403-10.
- 344 22. Crook H, Raza S, Nowell J, Young M, Edison P. Long covid-mechanisms, risk factors,  
345 and management. *BMJ (Clinical research ed).* 2021;374:n1648.
- 346 23. Number of smartphone subscriptions worldwide from 2016 to 2027 [Available from:  
347 <https://www.statista.com/statistics/330695/number-of-smartphone-users-worldwide/>.  
348



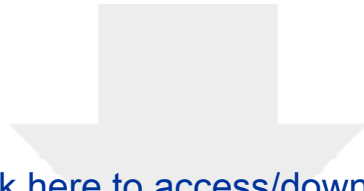

Click here to access/download  
**Supporting Information**  
Supporting Information.docx

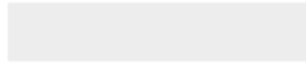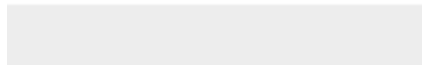

Supplement: pntd.0010724.s002.pdf [file pntd.0010724.s002.pdf]
